# Supplementary material for: Study on Mechanism of Iridoid Glycosides Derivatives from Fructus Gardeniae in Jiangxi Province by Network Pharmacology
Source: Evid Based Complement Alternat Med. 2020 Jun 26;2020:4062813. doi: 10.1155/2020/4062813 (PMC7336235; doi:10.1155/2020/4062813)
Supplement: Supplementary Materials — Supplementary 1. Table S1: the analysis data of chemicals-target (C-T) network. Supplementary 2. Table S2: the analysis data of target-disease (T-D) network. Supplementary 3. Table S3: the analysis data of targets-signaling pathway (T-P) network. [file 4062813.f1.zip]

Archive with 3 entries (3 files):
- 4062813.f1/TS1 C-T.xlsx
- 4062813.f1/TS2 T-D.xlsx
- 4062813.f1/TS3 T-P.xlsx
