# Supplementary material for: Study on Mechanism of Iridoid Glycosides Derivatives from Fructus Gardeniae in Jiangxi Province by Network Pharmacology
Source: Evid Based Complement Alternat Med. 2020 Jun 26;2020:4062813. doi: 10.1155/2020/4062813 (PMC7336235; doi:10.1155/2020/4062813)
Supplement: Supplementary Materials — Supplementary 1. Table S1: the analysis data of chemicals-target (C-T) network. Supplementary 2. Table S2: the analysis data of target-disease (T-D) network. Supplementary 3. Table S3: the analysis data of targets-signaling pathway (T-P) network. [file 4062813.f1.zip › 4062813.f1/TS1 C-T.xlsx]

## Sheet: C-T
CHEMICAL	Gene Code
Genipin 1-gentiobioside	MAPT
Genipin 1-gentiobioside	HIF1A
Genipin 1-gentiobioside	EPAS1
Genipin 1-gentiobioside	PTPN2
Genipin 1-gentiobioside	PTPN1
Genipin 1-gentiobioside	TRPV1
Genipin 1-gentiobioside	F2
Genipin 1-gentiobioside	TRPV4
Genipin 1-gentiobioside	TRPV2
Genipin 1-gentiobioside	TDP1
Genipin 1-gentiobioside	DRD1
Genipin 1-gentiobioside	DRD5
Genipin 1-gentiobioside	MLNR
Genipin 1-gentiobioside	GHSR
Genipin 1-gentiobioside	DRD2
Geniposidic acid	MAPT
Geniposidic acid	HIF1A
Geniposidic acid	EPAS1
Geniposidic acid	PRKCG
Geniposidic acid	PRKCB
Geniposidic acid	PRKCA
Geniposidic acid	PRKCQ
Geniposidic acid	PRKCD
Geniposidic acid	TDP1
Geniposidic acid	BCL2L1
Geniposidic acid	BCL2
Geniposidic acid	BCL2L2
Geniposidic acid	SLC6A2
Geniposidic acid	SLC6A3
Geniposidic acid	F2
gardenoside	MAPT
gardenoside	PRKCG
gardenoside	PRKCB
gardenoside	PRKCA
gardenoside	PRKCQ
gardenoside	PRKCD
gardenoside	HIF1A
gardenoside	EPAS1
gardenoside	PTPN2
gardenoside	PTPN1
gardenoside	TDP1
gardenoside	OPRM1
gardenoside	OPRD1
gardenoside	OPRK1
gardenoside	OPRL1
shanzhiside	MAPT
shanzhiside	HIF1A
shanzhiside	EPAS1
shanzhiside	TDP1
shanzhiside	PRKCA
shanzhiside	PRKCD
shanzhiside	PRKCG
shanzhiside	PRKCB
shanzhiside	PRKCQ
shanzhiside	HSD11B1
shanzhiside	HSD11B1L
shanzhiside	GLRA1
shanzhiside	GLRA2
shanzhiside	GLRA3
shanzhiside	GLRB
geniposide	MAPT
geniposide	PRKCG
geniposide	PRKCB
geniposide	PRKCA
geniposide	PRKCQ
geniposide	PRKCD
geniposide	HIF1A
geniposide	EPAS1
geniposide	BCL2L1
geniposide	BCL2
geniposide	BCL2L2
geniposide	OPRM1
geniposide	OPRD1
geniposide	OPRK1
geniposide	OPRL1
gardoside	MAPT
gardoside	HIF1A
gardoside	EPAS1
gardoside	GLRA1
gardoside	GLRA2
gardoside	GLRA3
gardoside	GLRB
gardoside	GLRA4
gardoside	HSD11B1
gardoside	HSD11B1L
gardoside	TDP1
gardoside	PRKCG
gardoside	PRKCB
gardoside	PRKCA
gardoside	PRKCQ
