# Supplementary material for: Study on Mechanism of Iridoid Glycosides Derivatives from Fructus Gardeniae in Jiangxi Province by Network Pharmacology
Source: Evid Based Complement Alternat Med. 2020 Jun 26;2020:4062813. doi: 10.1155/2020/4062813 (PMC7336235; doi:10.1155/2020/4062813)
Supplement: Supplementary Materials — Supplementary 1. Table S1: the analysis data of chemicals-target (C-T) network. Supplementary 2. Table S2: the analysis data of target-disease (T-D) network. Supplementary 3. Table S3: the analysis data of targets-signaling pathway (T-P) network. [file 4062813.f1.zip › 4062813.f1/TS2 T-D.xlsx]

## Sheet: T-D
Disease Name	Gene
Neoplasms	BCL2
Neoplasms	BCL2L1
Neoplasms	DRD2
Neoplasms	EPAS1
Neoplasms	F2
Neoplasms	GHSR
Neoplasms	GLRA3
Neoplasms	HIF1A
Neoplasms	MAPT
Neoplasms	PRKCA
Neoplasms	PRKCB
Neoplasms	PRKCD
Neoplasms	PRKCQ
Neoplasms	PTPN1
Neoplasms	PTPN2
Neoplasms	TRPV1
Neoplasms by Site	BCL2
Neoplasms by Site	BCL2L1
Neoplasms by Site	DRD2
Neoplasms by Site	EPAS1
Neoplasms by Site	F2
Neoplasms by Site	GHSR
Neoplasms by Site	GLRA3
Neoplasms by Site	HIF1A
Neoplasms by Site	MAPT
Neoplasms by Site	PRKCA
Neoplasms by Site	PRKCB
Neoplasms by Site	PRKCD
Neoplasms by Site	PTPN1
Neoplasms by Site	TRPV1
Digestive System Diseases	BCL2
Digestive System Diseases	BCL2L1
Digestive System Diseases	F2
Digestive System Diseases	GHSR
Digestive System Diseases	HIF1A
Digestive System Diseases	MAPT
Digestive System Diseases	OPRM1
Digestive System Diseases	PRKCA
Digestive System Diseases	PRKCB
Digestive System Diseases	PRKCD
Digestive System Diseases	PTPN1
Digestive System Diseases	PTPN2
Digestive System Diseases	TRPV1
Nervous System Diseases	BCL2
Nervous System Diseases	BCL2L1
Nervous System Diseases	DRD1
Nervous System Diseases	DRD2
Nervous System Diseases	DRD5
Nervous System Diseases	F2
Nervous System Diseases	GHSR
Nervous System Diseases	GLRA1
Nervous System Diseases	GLRB
Nervous System Diseases	HIF1A
Nervous System Diseases	MAPT
Nervous System Diseases	OPRD1
Nervous System Diseases	OPRK1
Nervous System Diseases	OPRL1
Nervous System Diseases	OPRM1
Nervous System Diseases	PRKCD
Nervous System Diseases	PRKCG
Nervous System Diseases	PTPN1
Nervous System Diseases	SLC6A2
Nervous System Diseases	SLC6A3
Nervous System Diseases	TDP1
Nervous System Diseases	TRPV1
Nervous System Diseases	TRPV4
Liver Diseases	BCL2
Liver Diseases	BCL2L1
Liver Diseases	F2
Liver Diseases	HIF1A
Liver Diseases	MAPT
Liver Diseases	OPRM1
Liver Diseases	PRKCA
Liver Diseases	PRKCB
Liver Diseases	PRKCD
Liver Diseases	PTPN1
Liver Diseases	TRPV1
Nutritional and Metabolic Diseases	BCL2
Nutritional and Metabolic Diseases	BCL2L1
Nutritional and Metabolic Diseases	F2
Nutritional and Metabolic Diseases	HSD11B1
Nutritional and Metabolic Diseases	MAPT
Nutritional and Metabolic Diseases	OPRM1
Nutritional and Metabolic Diseases	PRKCA
Nutritional and Metabolic Diseases	PRKCB
Nutritional and Metabolic Diseases	PRKCD
Nutritional and Metabolic Diseases	PRKCQ
Nutritional and Metabolic Diseases	PTPN1
Nutritional and Metabolic Diseases	TRPV1
Nutritional and Metabolic Diseases	TRPV4
Metabolic Diseases	BCL2
Metabolic Diseases	BCL2L1
Metabolic Diseases	HSD11B1
Metabolic Diseases	MAPT
Metabolic Diseases	OPRM1
Metabolic Diseases	PRKCA
Metabolic Diseases	PRKCB
Metabolic Diseases	PRKCD
Metabolic Diseases	PRKCQ
Metabolic Diseases	PTPN1
Metabolic Diseases	TRPV4
Male Urogenital Diseases	BCL2
Male Urogenital Diseases	BCL2L1
Male Urogenital Diseases	EPAS1
Male Urogenital Diseases	F2
Male Urogenital Diseases	HIF1A
Male Urogenital Diseases	HSD11B1
Male Urogenital Diseases	PRKCA
Male Urogenital Diseases	TRPV1
Male Urogenital Diseases	TRPV4
Musculoskeletal Diseases	BCL2
Musculoskeletal Diseases	F2
Musculoskeletal Diseases	GHSR
Musculoskeletal Diseases	GLRA1
Musculoskeletal Diseases	GLRB
Musculoskeletal Diseases	HSD11B1
Musculoskeletal Diseases	MAPT
Musculoskeletal Diseases	PRKCQ
Musculoskeletal Diseases	PTPN2
Musculoskeletal Diseases	TRPV4
Cardiovascular Diseases	BCL2
Cardiovascular Diseases	BCL2L1
Cardiovascular Diseases	DRD1
Cardiovascular Diseases	DRD2
Cardiovascular Diseases	F2
Cardiovascular Diseases	HIF1A
Cardiovascular Diseases	HSD11B1
Cardiovascular Diseases	MAPT
Cardiovascular Diseases	OPRD1
Cardiovascular Diseases	OPRK1
Cardiovascular Diseases	OPRL1
Cardiovascular Diseases	OPRM1
Cardiovascular Diseases	PRKCA
Cardiovascular Diseases	PRKCB
Cardiovascular Diseases	PRKCD
Cardiovascular Diseases	PTPN1
Cardiovascular Diseases	SLC6A2
Cardiovascular Diseases	TRPV1
Digestive System Neoplasms	BCL2
Digestive System Neoplasms	BCL2L1
Digestive System Neoplasms	F2
Digestive System Neoplasms	GHSR
Digestive System Neoplasms	HIF1A
Digestive System Neoplasms	MAPT
Digestive System Neoplasms	PRKCA
Digestive System Neoplasms	PRKCB
Digestive System Neoplasms	PRKCD
Mental Disorders	BCL2
Mental Disorders	BCL2L1
Mental Disorders	DRD1
Mental Disorders	DRD2
Mental Disorders	DRD5
Mental Disorders	F2
Mental Disorders	GHSR
Mental Disorders	MAPT
Mental Disorders	OPRD1
Mental Disorders	OPRK1
Mental Disorders	OPRL1
Mental Disorders	OPRM1
Mental Disorders	PRKCB
Mental Disorders	PRKCG
Mental Disorders	SLC6A3
Mental Disorders	TRPV4
Female Urogenital Diseases	BCL2
Female Urogenital Diseases	EPAS1
Female Urogenital Diseases	F2
Female Urogenital Diseases	GLRA3
Female Urogenital Diseases	HSD11B1
Female Urogenital Diseases	PRKCA
Female Urogenital Diseases	TRPV1
Female Urogenital Diseases	TRPV4
Central Nervous System Diseases	BCL2
Central Nervous System Diseases	BCL2L1
Central Nervous System Diseases	DRD1
Central Nervous System Diseases	DRD2
Central Nervous System Diseases	DRD5
Central Nervous System Diseases	F2
Central Nervous System Diseases	GHSR
Central Nervous System Diseases	GLRA1
Central Nervous System Diseases	HIF1A
Central Nervous System Diseases	MAPT
Central Nervous System Diseases	OPRD1
Central Nervous System Diseases	OPRM1
Central Nervous System Diseases	PRKCD
Central Nervous System Diseases	PRKCG
Central Nervous System Diseases	SLC6A3
Central Nervous System Diseases	TDP1
Central Nervous System Diseases	TRPV1
Central Nervous System Diseases	TRPV4
Neurologic Manifestations	BCL2
Neurologic Manifestations	BCL2L1
Neurologic Manifestations	DRD1
Neurologic Manifestations	DRD2
Neurologic Manifestations	DRD5
Neurologic Manifestations	GLRA1
Neurologic Manifestations	GLRB
Neurologic Manifestations	MAPT
Neurologic Manifestations	OPRK1
Neurologic Manifestations	OPRL1
Neurologic Manifestations	OPRM1
Neurologic Manifestations	PRKCD
Neurologic Manifestations	PRKCG
Neurologic Manifestations	PTPN1
Neurologic Manifestations	SLC6A2
Neurologic Manifestations	SLC6A3
Neurologic Manifestations	TRPV1
Neurologic Manifestations	TRPV4
Immune System Diseases	BCL2
Immune System Diseases	BCL2L1
Immune System Diseases	F2
Immune System Diseases	HSD11B1
Immune System Diseases	OPRM1
Immune System Diseases	PRKCA
Immune System Diseases	PRKCB
Immune System Diseases	PRKCD
Immune System Diseases	PRKCQ
Immune System Diseases	PTPN1
Immune System Diseases	PTPN2
Brain Diseases	BCL2
Brain Diseases	BCL2L1
Brain Diseases	DRD1
Brain Diseases	DRD2
Brain Diseases	F2
Brain Diseases	GHSR
Brain Diseases	HIF1A
Brain Diseases	MAPT
Brain Diseases	OPRD1
Brain Diseases	OPRM1
Brain Diseases	PRKCD
Brain Diseases	PRKCG
Brain Diseases	SLC6A3
Brain Diseases	TDP1
Brain Diseases	TRPV1
Endocrine System Diseases	BCL2
Endocrine System Diseases	BCL2L1
Endocrine System Diseases	DRD2
Endocrine System Diseases	GHSR
Endocrine System Diseases	GLRA3
Endocrine System Diseases	HIF1A
Endocrine System Diseases	HSD11B1
Endocrine System Diseases	PRKCA
Endocrine System Diseases	PRKCB
Endocrine System Diseases	PRKCD
Endocrine System Diseases	PRKCQ
Endocrine System Diseases	PTPN1
Endocrine System Diseases	TRPV4
Gastrointestinal Diseases	BCL2
Gastrointestinal Diseases	BCL2L1
Gastrointestinal Diseases	F2
Gastrointestinal Diseases	HIF1A
Gastrointestinal Diseases	PRKCA
Gastrointestinal Diseases	PRKCB
Gastrointestinal Diseases	PRKCD
Gastrointestinal Diseases	PTPN2
Gastrointestinal Diseases	TRPV1
Heart Diseases	BCL2
Heart Diseases	BCL2L1
Heart Diseases	DRD2
Heart Diseases	F2
Heart Diseases	HIF1A
Heart Diseases	MAPT
Heart Diseases	OPRK1
Heart Diseases	OPRL1
Heart Diseases	PRKCA
Heart Diseases	PRKCB
Respiratory Tract Diseases	BCL2
Respiratory Tract Diseases	BCL2L1
Respiratory Tract Diseases	HIF1A
Respiratory Tract Diseases	MAPT
Respiratory Tract Diseases	OPRM1
Respiratory Tract Diseases	PRKCA
Respiratory Tract Diseases	PTPN1
Respiratory Tract Diseases	TRPV1
Respiratory Tract Diseases	TRPV4
Chemically-Induced Disorders	BCL2
Chemically-Induced Disorders	BCL2L1
Chemically-Induced Disorders	DRD1
Chemically-Induced Disorders	DRD2
Chemically-Induced Disorders	GHSR
Chemically-Induced Disorders	OPRD1
Chemically-Induced Disorders	OPRK1
Chemically-Induced Disorders	OPRL1
Chemically-Induced Disorders	OPRM1
Chemically-Induced Disorders	PRKCD
Chemically-Induced Disorders	SLC6A3
Vascular Diseases	BCL2
Vascular Diseases	BCL2L1
Vascular Diseases	DRD1
Vascular Diseases	DRD2
Vascular Diseases	F2
Vascular Diseases	HIF1A
Vascular Diseases	HSD11B1
Vascular Diseases	OPRD1
Vascular Diseases	OPRM1
Vascular Diseases	PRKCD
Vascular Diseases	PTPN1
Vascular Diseases	SLC6A2
Vascular Diseases	TRPV1
Liver Cirrhosis	BCL2
Liver Cirrhosis	F2
Liver Cirrhosis	HIF1A
Liver Cirrhosis	PRKCB
Liver Cirrhosis	PRKCD
Liver Cirrhosis	PTPN1
Liver Cirrhosis	TRPV1
Hemic and Lymphatic Diseases	BCL2
Hemic and Lymphatic Diseases	BCL2L1
Hemic and Lymphatic Diseases	EPAS1
Hemic and Lymphatic Diseases	F2
Hemic and Lymphatic Diseases	PRKCB
Hemic and Lymphatic Diseases	PRKCD
Hemic and Lymphatic Diseases	PRKCQ
Hemic and Lymphatic Diseases	PTPN1
Hemic and Lymphatic Diseases	PTPN2
Neurodevelopmental Disorders	BCL2
Neurodevelopmental Disorders	DRD1
Neurodevelopmental Disorders	DRD2
Neurodevelopmental Disorders	DRD5
Neurodevelopmental Disorders	MAPT
Neurodevelopmental Disorders	PRKCB
Neurodevelopmental Disorders	PRKCG
Neurodevelopmental Disorders	SLC6A3
Neurodevelopmental Disorders	TRPV4
Neurodegenerative Diseases	BCL2
Neurodegenerative Diseases	BCL2L1
Neurodegenerative Diseases	DRD1
Neurodegenerative Diseases	DRD2
Neurodegenerative Diseases	F2
Neurodegenerative Diseases	MAPT
Neurodegenerative Diseases	PRKCG
Neurodegenerative Diseases	SLC6A3
Neurodegenerative Diseases	TDP1
Neurodegenerative Diseases	TRPV4
Intestinal Diseases	BCL2
Intestinal Diseases	F2
Intestinal Diseases	PRKCA
Intestinal Diseases	PRKCB
Intestinal Diseases	PRKCD
Intestinal Diseases	PTPN2
Neurobehavioral Manifestations	BCL2
Neurobehavioral Manifestations	DRD2
Neurobehavioral Manifestations	MAPT
Neurobehavioral Manifestations	PRKCG
Neurobehavioral Manifestations	PTPN1
Neurobehavioral Manifestations	SLC6A3
Neurobehavioral Manifestations	TRPV4
Poisoning	BCL2L1
Poisoning	DRD1
Poisoning	DRD2
Poisoning	OPRM1
Poisoning	PRKCD
Poisoning	SLC6A3
Joint Diseases	F2
Joint Diseases	HSD11B1
Joint Diseases	MAPT
Joint Diseases	PRKCQ
Joint Diseases	PTPN2
Joint Diseases	TRPV4
Arthritis	F2
Arthritis	HSD11B1
Arthritis	MAPT
Arthritis	PRKCQ
Arthritis	PTPN2
Arthritis	TRPV4
