# Supplementary material for: Study on Mechanism of Iridoid Glycosides Derivatives from Fructus Gardeniae in Jiangxi Province by Network Pharmacology
Source: Evid Based Complement Alternat Med. 2020 Jun 26;2020:4062813. doi: 10.1155/2020/4062813 (PMC7336235; doi:10.1155/2020/4062813)
Supplement: Supplementary Materials — Supplementary 1. Table S1: the analysis data of chemicals-target (C-T) network. Supplementary 2. Table S2: the analysis data of target-disease (T-D) network. Supplementary 3. Table S3: the analysis data of targets-signaling pathway (T-P) network. [file 4062813.f1.zip › 4062813.f1/TS3 T-P.xlsx]

## Sheet: P-T
Pathway	Gene
Neuroactive ligand-receptor interaction	DRD1
Neuroactive ligand-receptor interaction	DRD2
Neuroactive ligand-receptor interaction	DRD5
Neuroactive ligand-receptor interaction	F2
Neuroactive ligand-receptor interaction	GHSR
Neuroactive ligand-receptor interaction	GLRA1
Neuroactive ligand-receptor interaction	GLRA2
Neuroactive ligand-receptor interaction	GLRA3
Neuroactive ligand-receptor interaction	GLRB
Neuroactive ligand-receptor interaction	MLNR
Neuroactive ligand-receptor interaction	OPRD1
Neuroactive ligand-receptor interaction	OPRK1
Neuroactive ligand-receptor interaction	OPRL1
Neuroactive ligand-receptor interaction	OPRM1
Neuroactive ligand-receptor interaction	TRPV1
GPCR downstream signaling	DRD1
GPCR downstream signaling	DRD2
GPCR downstream signaling	DRD5
GPCR downstream signaling	F2
GPCR downstream signaling	GHSR
GPCR downstream signaling	MLNR
GPCR downstream signaling	OPRD1
GPCR downstream signaling	OPRK1
GPCR downstream signaling	OPRL1
GPCR downstream signaling	OPRM1
GPCR downstream signaling	PRKCA
GPCR downstream signaling	PRKCB
GPCR downstream signaling	PRKCD
GPCR downstream signaling	PRKCG
GPCR downstream signaling	PRKCQ
Inflammatory mediator regulation of TRP channels	PRKCA
Inflammatory mediator regulation of TRP channels	PRKCB
Inflammatory mediator regulation of TRP channels	PRKCD
Inflammatory mediator regulation of TRP channels	PRKCG
Inflammatory mediator regulation of TRP channels	PRKCQ
Inflammatory mediator regulation of TRP channels	TRPV1
Inflammatory mediator regulation of TRP channels	TRPV2
Inflammatory mediator regulation of TRP channels	TRPV4
Signaling by GPCR	DRD1
Signaling by GPCR	DRD2
Signaling by GPCR	DRD5
Signaling by GPCR	F2
Signaling by GPCR	GHSR
Signaling by GPCR	MLNR
Signaling by GPCR	OPRD1
Signaling by GPCR	OPRK1
Signaling by GPCR	OPRL1
Signaling by GPCR	OPRM1
Signaling by GPCR	PRKCA
Signaling by GPCR	PRKCB
Signaling by GPCR	PRKCD
Signaling by GPCR	PRKCG
Signaling by GPCR	PRKCQ
Class A/1 (Rhodopsin-like receptors)	DRD1
Class A/1 (Rhodopsin-like receptors)	DRD2
Class A/1 (Rhodopsin-like receptors)	DRD5
Class A/1 (Rhodopsin-like receptors)	F2
Class A/1 (Rhodopsin-like receptors)	GHSR
Class A/1 (Rhodopsin-like receptors)	MLNR
Class A/1 (Rhodopsin-like receptors)	OPRD1
Class A/1 (Rhodopsin-like receptors)	OPRK1
Class A/1 (Rhodopsin-like receptors)	OPRL1
Class A/1 (Rhodopsin-like receptors)	OPRM1
GPCR ligand binding	DRD1
GPCR ligand binding	DRD2
GPCR ligand binding	DRD5
GPCR ligand binding	F2
GPCR ligand binding	GHSR
GPCR ligand binding	MLNR
GPCR ligand binding	OPRD1
GPCR ligand binding	OPRK1
GPCR ligand binding	OPRL1
GPCR ligand binding	OPRM1
Ion channel transport	GLRA1
Ion channel transport	GLRA2
Ion channel transport	GLRA3
Ion channel transport	GLRA4
Ion channel transport	GLRB
Ion channel transport	TRPV1
Ion channel transport	TRPV2
Ion channel transport	TRPV4
Dopaminergic synapse	DRD1
Dopaminergic synapse	DRD2
Dopaminergic synapse	DRD5
Dopaminergic synapse	PRKCA
Dopaminergic synapse	PRKCB
Dopaminergic synapse	PRKCG
Dopaminergic synapse	SLC6A3
Ligand-gated ion channel transport	GLRA1
Ligand-gated ion channel transport	GLRA2
Ligand-gated ion channel transport	GLRA3
Ligand-gated ion channel transport	GLRA4
Ligand-gated ion channel transport	GLRB
Transmembrane transport of small molecules	GLRA1
Transmembrane transport of small molecules	GLRA2
Transmembrane transport of small molecules	GLRA3
Transmembrane transport of small molecules	GLRA4
Transmembrane transport of small molecules	GLRB
Transmembrane transport of small molecules	SLC6A2
Transmembrane transport of small molecules	SLC6A3
Transmembrane transport of small molecules	TRPV1
Transmembrane transport of small molecules	TRPV2
Transmembrane transport of small molecules	TRPV4
Peptide ligand-binding receptors	F2
Peptide ligand-binding receptors	GHSR
Peptide ligand-binding receptors	MLNR
Peptide ligand-binding receptors	OPRD1
Peptide ligand-binding receptors	OPRK1
Peptide ligand-binding receptors	OPRL1
Peptide ligand-binding receptors	OPRM1
G alpha (z) signalling events	PRKCA
G alpha (z) signalling events	PRKCB
G alpha (z) signalling events	PRKCD
G alpha (z) signalling events	PRKCG
G alpha (z) signalling events	PRKCQ
Amphetamine addiction	DRD1
Amphetamine addiction	PRKCA
Amphetamine addiction	PRKCB
Amphetamine addiction	PRKCG
Amphetamine addiction	SLC6A3
Platelet activation, signaling and aggregation	F2
Platelet activation, signaling and aggregation	PRKCA
Platelet activation, signaling and aggregation	PRKCB
Platelet activation, signaling and aggregation	PRKCD
Platelet activation, signaling and aggregation	PRKCG
Platelet activation, signaling and aggregation	PRKCQ
Platelet activation, signaling and aggregation	PTPN1
Disinhibition of SNARE formation	PRKCA
Disinhibition of SNARE formation	PRKCB
Disinhibition of SNARE formation	PRKCG
Dopamine receptors	DRD1
Dopamine receptors	DRD2
Dopamine receptors	DRD5
EGFR tyrosine kinase inhibitor resistance	BCL2
EGFR tyrosine kinase inhibitor resistance	BCL2L1
EGFR tyrosine kinase inhibitor resistance	PRKCA
EGFR tyrosine kinase inhibitor resistance	PRKCB
EGFR tyrosine kinase inhibitor resistance	PRKCG
Gap junction	DRD1
Gap junction	DRD2
Gap junction	PRKCA
Gap junction	PRKCB
Gap junction	PRKCG
Morphine addiction	DRD1
Morphine addiction	OPRM1
Morphine addiction	PRKCA
Morphine addiction	PRKCB
Morphine addiction	PRKCG
HIF-1 signaling pathway	BCL2
HIF-1 signaling pathway	HIF1A
HIF-1 signaling pathway	PRKCA
HIF-1 signaling pathway	PRKCB
HIF-1 signaling pathway	PRKCG

## Sheet: C-T
CHEMICAL	Gene
Genipin 1-gentiobioside	MAPT
Genipin 1-gentiobioside	HIF1A
Genipin 1-gentiobioside	EPAS1
Genipin 1-gentiobioside	PTPN2
Genipin 1-gentiobioside	PTPN1
Genipin 1-gentiobioside	TRPV1
Genipin 1-gentiobioside	F2
Genipin 1-gentiobioside	TRPV4
Genipin 1-gentiobioside	TRPV2
Genipin 1-gentiobioside	TDP1
Genipin 1-gentiobioside	DRD1
Genipin 1-gentiobioside	DRD5
Genipin 1-gentiobioside	MLNR
Genipin 1-gentiobioside	GHSR
Genipin 1-gentiobioside	DRD2
Geniposidic acid	MAPT
Geniposidic acid	HIF1A
Geniposidic acid	EPAS1
Geniposidic acid	PRKCG
Geniposidic acid	PRKCB
Geniposidic acid	PRKCA
Geniposidic acid	PRKCQ
Geniposidic acid	PRKCD
Geniposidic acid	TDP1
Geniposidic acid	BCL2L1
Geniposidic acid	BCL2
Geniposidic acid	BCL2L2
Geniposidic acid	SLC6A2
Geniposidic acid	SLC6A3
Geniposidic acid	F2
gardenoside	MAPT
gardenoside	PRKCG
gardenoside	PRKCB
gardenoside	PRKCA
gardenoside	PRKCQ
gardenoside	PRKCD
gardenoside	HIF1A
gardenoside	EPAS1
gardenoside	PTPN2
gardenoside	PTPN1
gardenoside	TDP1
gardenoside	OPRM1
gardenoside	OPRD1
gardenoside	OPRK1
gardenoside	OPRL1
shanzhiside	MAPT
shanzhiside	HIF1A
shanzhiside	EPAS1
shanzhiside	TDP1
shanzhiside	PRKCA
shanzhiside	PRKCD
shanzhiside	PRKCG
shanzhiside	PRKCB
shanzhiside	PRKCQ
shanzhiside	HSD11B1
shanzhiside	HSD11B1L
shanzhiside	GLRA1
shanzhiside	GLRA2
shanzhiside	GLRA3
shanzhiside	GLRB
geniposide	MAPT
geniposide	PRKCG
geniposide	PRKCB
geniposide	PRKCA
geniposide	PRKCQ
geniposide	PRKCD
geniposide	HIF1A
geniposide	EPAS1
geniposide	BCL2L1
geniposide	BCL2
geniposide	BCL2L2
geniposide	OPRM1
geniposide	OPRD1
geniposide	OPRK1
geniposide	OPRL1
gardoside	MAPT
gardoside	HIF1A
gardoside	EPAS1
gardoside	GLRA1
gardoside	GLRA2
gardoside	GLRA3
gardoside	GLRB
gardoside	GLRA4
gardoside	HSD11B1
gardoside	HSD11B1L
gardoside	TDP1
gardoside	PRKCG
gardoside	PRKCB
gardoside	PRKCA
gardoside	PRKCQ
